# Supplementary material
Source: Elsevier journal article supplement (https://www.sciencedirect.com/science/article/pii/S1413867016300484)
Supplement: mmc1 [file S1413867016300484:mmc1.doc]

**Supplementary Material**

This supplementary material provides data regarding cost calculation and curve calibration for cost-effectiveness analysis.

Table S1 - Data for Curve Calibration.

|  | Bundled ASP  Probability (%) | | Conventional ASP  Probability (%) | |
| --- | --- | --- | --- | --- |
| Cohort Day | Alive-Alive | Alive-Death | Alive-Alive | Alive-Death |
| 1 | 2.87 | 0.02 | 18.3 | 2.59 |
| 2 | 2.87 | 0.02 | 1.77 | 5.66 |
| 3 | 2.81 | 6.32 | 1.73 | 3.18 |
| 4 | 2.79 | 1.68 | 1.7 | 3.82 |
| 5 | 2.77 | 16.76 | 1.66 | 3.74 |
| 6 | 2.72 | 6.38 | 1.59 | 6.31 |
| 7 | 2.66 | 4.61 | 1.59 | 1.91 |
| 8 | 2.63 | 31.9 | 1.57 | 0.63 |
| 9 | 2.60 | 3.16 | 1.54 | 3.14 |
| 10 | 2.58 | 1.56 | 1.51 | 2.62 |
| 11 | 2.52 | 6.21 | 1.48 | 3.18 |
| 12 | 2.51 | 15.15 | 1.46 | 1.92 |
| 13 | 2.47 | 3.26 | 1.43 | 3.22 |
| 14 | 2.41 | 6.19 | .143 | 0.01 |
| 15 | 2.40 | 1.45 | 1.41 | 1.28 |
| 16 | 2.38 | 1.68 | 1.39 | 2.55 |
| 17 | 2.35 | 3.09 | 1.38 | 0.69 |
| 18 | 2.35 | 0.02 | 1.38 | 0.69 |
| 19 | 2.33 | 1.64 | 1.38 | 0.01 |
| 20 | 2.32 | 1.63 | 1.36 | 1.93 |
| 21 | 2.28 | 3.25 | 1.32 | 3.81 |
| 22 | 2.27 | 1.60 | 1.29 | 3.17 |
| 23 | 2.23 | 3.18 | 1.26 | 2.58 |
| 24 | 2.23 | 0.02 | 1.26 | 0.01 |
| 25 | 2.22 | 15.67 | 1.23 | 2.53 |
| 26 | 2.22 | 0.02 | 1.22 | 1.85 |
| 27 | 2.20 | 15.56 | 1.21 | 0.61 |
| 28 | 2.19 | 1.54 | 1.21 | 0.01 |
| 29 | 2.19 | 0.02 | 1.20 | 1.21 |
| 30 | 2.17 | 1.53 | 1.19 | 0.60 |
| ASP, Antimicrobial Stewardship Program.  Notes: Calibration curve (beta distribution) based on two health transitions: Alive-Alive or Alive-Death. Probabilities were extracted from survival curve, reference 11. | | | | |

Table S2 - Length of stay costs.

|  | Bundled ASP | | | Conventional ASP | | |
| --- | --- | --- | --- | --- | --- | --- |
|  | Days | Cost per Day | Final Cost | Days | Cost per Day | Final Cost |
| General ward | 17.9±12.5 | 1,132.52 | 20,272.11* | 16.7±12.8 | 1,132.52 | 15,515.52¢ |
| Intensive care units | 29.1±37.3 | 1,782.19 | 51,861.72α | 20.3±22.8 | 1,782.19 | 36,178.46§ |
| Both (Total) | - | - | 72,133.83δ | - | - | 51,693.97ß |
| ASP, Antimicrobial Stewardship Program.  Notes: Costs were expressed as “Reais” (R$ / Brazilian currency). All costs were input to mathematical modeling in local currency (R$). There were no differences on length of stay between groups [11].  Equivalent costs in US$: *(9527.89), α(24,375.01), δ(33,902.90), ¢(7,292.29), §(17,003.87), ß(24,296.17).  Costs per day were based on direct, indirect and apportionment costs. Direct costs were: human resources costs (ward physician, other health professionals and assistant residents), material resources (drugs, hospital and medical materials, orthotics, prosthetics, medicinal gas, kitchen, hygiene and cleaning, and ward maintenance). Indirect costs were sewer, water and electrical energy. Apportionment costs were divided between all wards and included: telephone and communication, clinical engineering services, infection control services, surgery team services and other hospitals’ divisions. All costs were consulted with Planning and Human Resources Department. | | | | | | |

Table S3 - Defined daily dose costs.

|  | **Optimized ASP** | | **Conventional ASP** | |
| --- | --- | --- | --- | --- |
|  | **DDD per Patient** | **Cost-DDD per patient** | **DDD per Patient** | **Cost-DDD per patient** |
| **Averagea** | 417.01 | R$ 3.991,34 | 557.21 | R$ 9.818,67 |
| **SD** | 56.07 | R$ 227,77 | 10.25 | R$ 370,54 |
| **Upper** | 423.01 | R$ 4.011,84 | 558.30 | R$ 9.852,03 |
| **Lower** | 411.02 | R$ 3.970,83 | 556.11 | R$ 9.785,31 |
| DDD, Defined Daily Doses; ATM, Antimicrobial; SD, standard deviation.  a Costs of ATM consumption that were input in mathematical model were: Optimized ASP US$ 1875.77 ± 107.05 and Conventional ASP US$ 4614.77 ± 174.15.  Notes: We considered the following costs per vial: sulbactam amoxicillin 1000 mg (R$ 32.33), amoxicillin 500 mg (R$ 0.04), amoxicillin clavulanate 500 mg / 125 mg (R$ 0.04), ampicillin 1000 mg (R$ 0.62),  ampicillin sulbactam 1000 mg (R$ 1.75), intravenous azithromycin 500 mg (R$ 103.4), oral azithromycin 500 mg (R$ 0.38), cephalexin 500 mg (R$ 0.08), cefazolin 1 g (R$ 0.81), cefepime 1000 mg (R$ 1.9), cefotaxime 1g (R$ 1.42), ceftriaxone 1000 mg (R$ 0.77), ceftazidime 1g (R$ 1.79), intravenous ciprofloxacin 200 mg (R$ 1.43), oral ciprofloxacin 500 mg (R$ 0.1), CLARITHROMYCIN 500 mg (R$ 8,81), oral clindamycin 300 mg (R$ 0.27), intravenous clindamycin 600 mg (R$ 0.74), daptomycin 500 mg (R$ 240.23), gentamicin 80 mg (R$ 0.34), intravenous levofloxacin 500 mg (R$ 5.9), oral levofloxacin 500 mg (R$ 0.49), linezolid 600 mg (R$ 209.92), meropenem 500 mg (R$ 10), meropenem 1000 mg (R$ 14.57), intravenous metronidazole 500 mg (R$ 1.2), oral metronidazole 250 mg (R$ 0.05), oxacillin 500 mg (R$ 0.53), rifampicin 300 mg (R$ 1.7), penicillin K 3g (R$ 1), piperacillin tazobactam 4000 mg (R$ 4.29), polymyxin B 500,000 IU (R$ 45), intravenous trimethoprim sulfamethoxazole 400 mg (R$ 1.46), sulfamethoxazole trimethoprim oral 400 mg (R$ 0.04), tigecycline 50 mg (R$ 136.36), vancomycin 500 mg (R$ 1.99).  Cost-DDD per patient is the product of “DDD per patient” multiplied by ATM costs. It adjust drug costs according to patient dose, not only by vial costs. | | | | |

Table S4 - Image and lab costs used for diagnostics.

|  | **Bundled ASP** | | **Conventional ASP** | |
| --- | --- | --- | --- | --- |
| **Infection Site** | **Count (%)** | **Cost (R$)** | **Count (%)** | **Cost (R$)** |
| Blood site | 60 (31.4) | 9,349.85 | 78 (26) | 11,661.00 |
| Central Nervous System | 6 (3.1) | 2,656.5 | 6 (2) | 2,656.50 |
| Gastrointestinal | 25 (13.1) | 10,823.00 | 44 (14.7) | 19,048.48 |
| Skin and Soft Tissue | 14 (7.3) | 2,484.00 | 23 (7.7) | 1,840.00 |
| Respiratory Tract | 54 (28.3) | 8,650.26 | 114 (38) | 18,261.66 |
| VAP | 5 (2.6) | 1,046.5 | 15 (5) | 1,719.25 |
| Urinary Tract | 27 (14.2) | 1,174.7 | 20 (6.6) | 3,524.10 |
| All Sites (Total) a | - | 36,184.81b | - | 58,710.99c |
| ASP, Antimicrobial Stewardship Program; VAP, Ventilation-Associated Pneumoniae.  aCosts that were input in the mathematical model, they were divided by number of patients.  bUS$ 17,006.86.  cUS$ 27,594.17.  Notes: Costs per exam expressed as US$: blood culture (55.32), anaerobe culture (80.85), antibiogram (63.83), liquor culture (217.01), peritoneal liquid culture (55.32), urine culture (46.81), urine analysis (21.28), broncheal or tracheal aspirate culture (55.32), biopsy culture (55.32), A/B *Clostridium* spp. toxine (59.57), transesophageal echocardiogram (225.77), posterior to anterior X-ray (27.66), bilateral X-ray (35.56), ultrasound methods (150.16).  Costs per infection site lab or image diagnostic expressed as US$: blood site (70.27), endocarditis (248.79), central nervous system (208.09), gastrointestinal (203.47), skin and soft tissue (43.24), respiratory tract (75.29), Ventilation-Associated Pneumoniae (35.13), urinary tract (110.42). | | | | |

Table S5 - Human workload costs.

| **Staff** | **Hours/day** | **Salary/hour** | **Worked Days** | **Total Workload Cost** |
| --- | --- | --- | --- | --- |
| Pharmacist | 5.5 (3~8) | 12.40α | 119 | R$ 8.776,70§ |
| ID MD Resident | 1.3 (1~3) | 12,40 | 119 | R$ 2.846,05¢ |
| ID MD Preceptor | 1 (0.5~1.5) | 96,45ß | 119 | R$ 11.477,28δ |
| All Staff | - | - | - | **R$ 23.100,03**ϒ |
| ID MD, Infectious Diseases Medical Doctor; R$, Brazilian Currency.  Notes: The aforementioned costs refers to Bundled Strategy ASP and Conventional (which has a passive strategy, accounted only for Pharmacist’s workload costs). Equivalent costs in US$: α (5.83), ß (45.35), § (4125.02), ¢ (1337.62), δ (5394.32), ϒ (10,857.01). All costs were input to mathematical modeling in local currency. | | | | |
